# Supplementary material
Source: HighWire-hosted journal article supplement (https://erj.ersjournals.com/content/56/6/2002808)
Supplement: inline-supplementary-material-1 [file inline-supplementary-material-1.pdf]

|                                                                          |                      | Number of patients in oxygen support group at baseline (%) |                         |                    |                         |                 |                     |                        |                    |                         |                 |
|--------------------------------------------------------------------------|----------------------|------------------------------------------------------------|-------------------------|--------------------|-------------------------|-----------------|---------------------|------------------------|--------------------|-------------------------|-----------------|
|                                                                          |                      | Methylprednisolone group                                   |                         |                    |                         |                 | Standard care group |                        |                    |                         |                 |
|                                                                          |                      | NIV<br>(13)                                                | Reserve<br>Mask<br>(12) | Simple<br>Mask (5) | Nasal<br>Cannula<br>(4) | Negative<br>(0) | NIV (10)            | Reserve<br>Mask<br>(7) | Simple<br>Mask (2) | Nasal<br>Cannula<br>(9) | Negative<br>(0) |
| Number of patients in oxygen support group after 3 days of treatment (%) | Invasive Ventilation | 2<br>(23.1%)                                               | 0                       | 0                  | 0                       | 0               | 5<br>(50.0%)        | 3<br>(42.8%)           | 0                  | 1<br>(11.1%)            | 0               |
|                                                                          | NIV                  | 3<br>(23.1%)                                               | 0                       | 0                  | 0                       | 0               | 3<br>(30.0%)        | 1<br>(14.3%)           | 1<br>(50.0%)       | 1<br>(11.1%)            | 0               |
|                                                                          | Reserve Mask         | 5<br>(38.5%)                                               | 5<br>(41.7%)            | 0                  | 0                       | 0               | 1<br>(10.0%)        | 0                      | 0                  | 2<br>(22.2%)            | 0               |
|                                                                          | Simple Mask          | 1<br>(7.7%)                                                | 1<br>(8.3%)             | 1 20.0%            | 0                       | 0               | 0                   | 0                      | 1<br>(50.0%)       | 0                       | 0               |
|                                                                          | Nasal Cannula        | 2<br>(15.4%)                                               | 3<br>(25.0%)            | 2<br>(40.0%)       | 2<br>(50.0%)            | 0               | 1<br>(10.0%)        | 3<br>(42.8%)           | 0                  | 4<br>(44.4%)            | 0               |
|                                                                          | negative             | 0                                                          | 1<br>(8.3%)             | 2<br>(40.0%)       | 2<br>(50.0%)            | 0               | 0                   | 0                      | 0                  | 1<br>(11.1%)            | 0               |
| Outcome                                                                  | Discharged           | 12<br>(84.6%)                                              | 11<br>(91.7%)           | 5 (100%)           | 4 (100%)                | 0               | 4<br>(40.0%)        | 3<br>(42.8%)           | 2<br>(100%)        | 7<br>(77.7%)            | 0               |
|                                                                          | Death                | 1<br>(7.7%)                                                | 1<br>(8.3%)             | 0                  | 0                       | 0               | 6<br>(60.0%)        | 4<br>(57.1%)           | 0                  | 2<br>(22.2%)            | 0               |

**Supplementary Figure 1.** The patient's status regarding their oxygen supports before and after treatment and the main outcome of each group. For each oxygen-support category (invasive ventilation, noninvasive ventilation (NIV), reserve mask, simple mask, and nasal cannula), percentages were calculated with the number of patients at baseline and after 3 days of treatment in both groups. Improvement (green cells), no change (blue), and worsening (orange) in oxygen-support status are shown.
