# Supplementary material
Source: HighWire-hosted journal article supplement (https://erj.ersjournals.com/content/56/6/2002808)
Supplement: inline-supplementary-material-2 [file inline-supplementary-material-2.pdf]

|                                                                      |            | Number of patients in pulmonary involvements group before treatment |            |            |            |          |
|----------------------------------------------------------------------|------------|---------------------------------------------------------------------|------------|------------|------------|----------|
|                                                                      |            | Methylprednisolone group (11)                                       |            |            |            |          |
|                                                                      |            | E (>70%)                                                            | D (50-70%) | C (30-50%) | B (10-30%) | A (<10%) |
| Number of patients in pulmonary involvements group at discharge time | E (>70%)   | 0                                                                   | 0          | 0          | 0          | 0        |
|                                                                      | D (50-70%) | 0                                                                   | 0          | 0          | 0          | 0        |
|                                                                      | C (30-50%) | 3                                                                   | 3          | 0          | 0          | 0        |
|                                                                      | B (10-30%) | 0                                                                   | 0          | 4          | 0          | 0        |
|                                                                      | A (<10%)   | 0                                                                   | 0          | 0          | 1          | 0        |

**Supplementary Figure 2.** Number of patients in different pulmonary involvement groups before and after treatment in the methylprednisolone group. For each pulmonary involvement category (A-E), the number of patients at baseline and at discharge time in the methylprednisolone group has been shown. Improvement (green cells), no change (blue), and worsening (orange) in pulmonary involvements status are shown.
