# Supplementary material
Source: HighWire-hosted journal article supplement (https://erj.ersjournals.com/content/56/6/2002808)
Supplement: inline-supplementary-material-3 [file inline-supplementary-material-3.pdf]

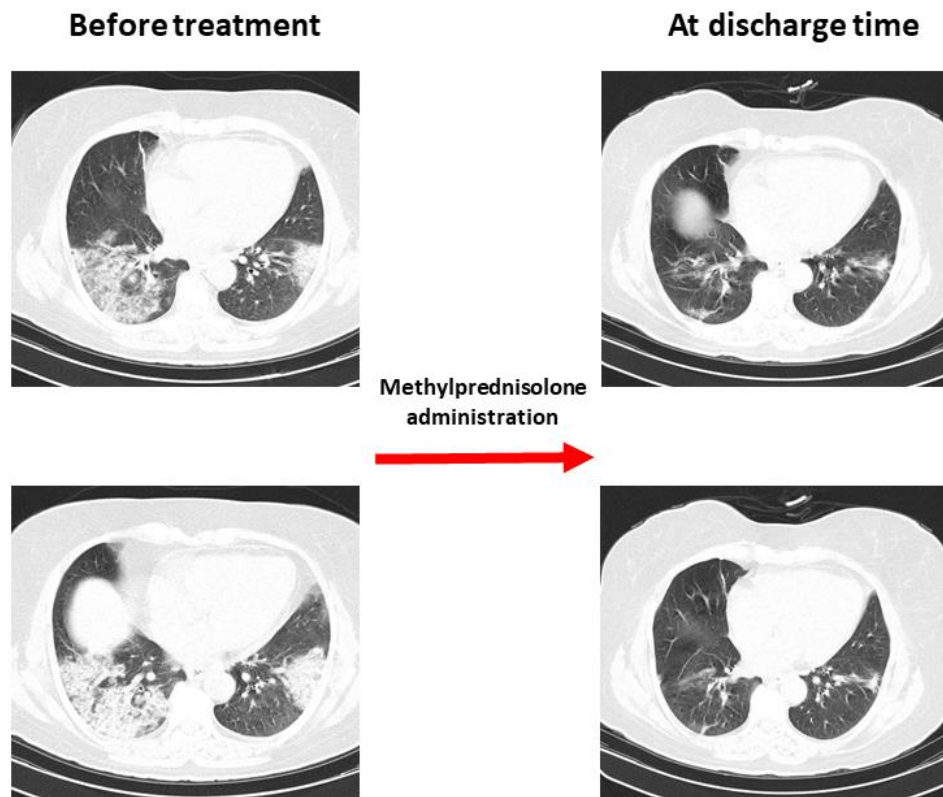

**Supplementary Figure 3.** Improved pulmonary involvement in a chest computed tomography (CT) of a 55 years old, confirmed COVID-19 patient from methylprednisolone group after 21 days of treatment (at discharge time).
