# Supplementary material
Source: HighWire-hosted journal article supplement (https://erj.ersjournals.com/content/56/6/2002808)
Supplement: inline-supplementary-material-4 [file inline-supplementary-material-4.pdf]

**Supplementary Table 1.** Summary of adverse events in patients.

| <b>Characteristic</b>             | <b>Methylprednisolone<br/>(N=34)</b> | <b>Standard care<br/>(N=28)</b> | <b><i>P</i> value</b> |
|-----------------------------------|--------------------------------------|---------------------------------|-----------------------|
| <b>Infection, no (%)</b>          | 1 (2.9%)                             | 0                               | 0.548                 |
| <b>Edema, no (%)</b>              | 1(2.9%)                              | 0                               | 0.548                 |
| <b>Shock, no (%)</b>              | 0                                    | 2 (7.1%)                        | 0.208                 |
| <b>Digestive bleeding, no (%)</b> | 0                                    | 0                               | NA                    |
| <b>Others</b>                     | 0                                    | 0                               | NA                    |

NA: Not applicable
