# Supplementary material
Source: HighWire-hosted journal article supplement (https://erj.ersjournals.com/content/56/6/2002808)
Supplement: inline-supplementary-material-5 [file inline-supplementary-material-5.pdf]

**Supplementary Table 2.** Clinical characteristics of the recovered patients one week after discharge (Methylprednisolone n=32, Standard care n=16).

| Characteristic    | Before treatment   |      |               |      | One week after discharge |      |                  |               |      |                |
|-------------------|--------------------|------|---------------|------|--------------------------|------|------------------|---------------|------|----------------|
|                   | Methylprednisolone |      | Standard care |      | Methylprednisolone       |      | <i>P</i> value   | Standard care |      | <i>P</i> value |
|                   | Mean               | SD   | Mean          | SD   | Mean                     | SD   |                  | Mean          | SD   |                |
| <b>BORG score</b> | 7.6                | 1.7  | 6.43          | 2.6  | 0.75                     | 0.62 | <b>&lt;0.001</b> | 1             | 0.63 | <b>0.001</b>   |
|                   | no                 | %    | no            | %    | no                       | %    |                  | no            | %    |                |
| <b>GI Symptom</b> | 16                 | 50   | 7             | 43.8 | 0                        | 0    | <b>0.016</b>     | 1             | 6.3  | 0.50           |
| <b>Myalgia</b>    | 17                 | 53.1 | 7             | 43.8 | 0                        | 0    | <b>0.043</b>     | 1             | 6.3  | 0.50           |
| <b>Chest pain</b> | 7                  | 22   | 3             | 18.8 | 0                        | 0    | 0.125            | 0             | 0    | 0.69           |
| <b>Cough</b>      | 22                 | 68.8 | 9             | 56.3 | 6                        | 18.8 | 0.250            | 3             | 18.8 | 0.55           |

*P* value in the bold form is statistically significant (*P* value< 0.05)

SD, Standard deviation; GI, Gastrointestinal;
